# Supplementary material for: How side-chain substituents and substrates influence mechanochromic luminescence: case study with pyrene
Source: Royal Society of Chemistry journal article supplement (doi:10.1039/c7ra09453a), 2017-01-01
Supplement: c7ra09453a1.pdf [file c7ra09453a1.pdf]

## Electronic Supplementary Information for

### **How Side-Chain Substituents and Substrates Influence Mechanochromic Luminescence: Case Study with Pyrene**

Zongzheng Qian,<sup>a</sup> Weiting Deng,<sup>a</sup> Xuepeng Zhang,<sup>a</sup> Hui Miao,<sup>\*a</sup>  
and Guoqing Zhang<sup>\*a</sup>

<sup>a</sup>Hefei National Laboratory for Physical Sciences at the Microscale, University of Science and Technology of China, 96 Jinzhai Road, Hefei, Anhui, 230026, China.

E-mail: gzhang@ustc.edu.cn

<sup>b</sup>Innovation Center of Chemistry for Energy Materials, Department of Chemical Physics, University of Science and Technology of China, Hefei, 230026 Anhui, China.

#### **Materials and Methods**

**Materials.** CH<sub>2</sub>Cl<sub>2</sub> were dried refluxing over CaH<sub>2</sub> for at least 6 h prior to use. THF was dried by KOH for overnight first and then refluxing over sodium using benzophenone as an indicator. Water was deionized with a Milli2Q SP reagent water system (Millipore) to a specific resistivity of 18.2 MΩ.cm. All other reagents and solvents were obtained from Aladdin Reagent (Shanghai) and were used as received.

**Methods.** <sup>1</sup>H and <sup>13</sup>C NMR spectra were recorded on a Bruker AV400 NMR spectrometer operated in the Fourier transform mode. <sup>1</sup>H NMR spectra were referenced to the signal for residual protio chloroform at 7.26 ppm and coupling constants are given in hertz. ESI-MS experiments were performed on Thermo Scientific LTQ Orbitrap Mass Spectrometer equipped with an electrospray interface. Melting point was recorded on a SGW2X4 (Shanghai Precision and Scientific Instrument Co., Ltd.) illuminated microscope melting point apparatus. Differential scanning calorimetry (DSC) measurements were conducted at 20 °C/min under nitrogen atmosphere on Mettler-Toledo DSC (Mettler-Toledo Co., Ltd., Zurich, Switzerland). UV-Vis

absorption spectra were recorded on a Beijing Persee TU-1901 UV-vis spectrometer. Photographs were taken by a Cannon 500D digital camera. Micrographs were taken on an Olympus DP72 color camera mounted on a BX51 microscope. Steady-state emission spectra were recorded on a Horiba FluoroMax-4 spectrofluorometer (Japan). Fluorescence lifetime data were acquired with a 1MHz LED laser with the excitation peak at 369 nm (NanoLED-370). Lifetime data were analyzed with DataStation v6.6 (Horiba Scientific). Absolute quantum yields were measured with HORIBA Quanta- $\phi$  integrating sphere in combination with Horiba FluoroMax-4 spectrofluorometer. Powder X-ray diffraction patterns (PXRD) were collected on a Siemens D-500 diffractometer using Cu-K $\alpha$  radiation. Single crystal data were acquired with a Gemini S Ultra Single Crystal Diffractometer. Mechanochromic fluorescence spectra in the solid state were recorded on an Ocean Optics USB4000-VIS-NIR Spectrometer equipped with an optical fiber with an integrated LED excitation module ( $\lambda_{\text{ex}} = 365$  nm). The spectra were analyzed in SpectraSuite (Ocean Optics, v2008).

## Synthesis

### 1P1F

1,1,2,2-Tetrahydroperfluoro-1-decanol (3.2 g, 6.9 mmol), 1-pyrenebutyric acid (1.0 g, 3.5 mmol), EDC•HCl (1.32 g, 6.9 mmol), and dry THF (60 ml) were added to a round bottom flask equipped with a magnetic stir bar. After cooling to 0 °C in an ice-water bath, DMAP (1.68 g, 13.8 mmol) was added. The reaction was conducted under 25 °C for 12 h, and THF was removed in vacuo, the resulting solid was dissolved in ethyl acetate, washed with aqueous 1 M HCl and brine, dried over MgSO<sub>4</sub>, and filtered. The crude product was purified by silica gel column chromatography, yielding a white powder (2.0 g, 80 %). <sup>1</sup>H NMR (400 MHz, CDCl<sub>3</sub>),  $\delta$  (TMS, ppm): 8.32-7.82 (9H, pyrene, -ArH), 4.37 (2H, b, -OCH<sub>2</sub>CH<sub>2</sub>CF<sub>2</sub>), 3.40 (2H, e, -ArCH<sub>2</sub>CH<sub>2</sub>CH<sub>2</sub>COO), 2.52-2.37 (4H, a+c, -OCH<sub>2</sub>CH<sub>2</sub>CF<sub>2</sub> and -ArCH<sub>2</sub>CH<sub>2</sub>CH<sub>2</sub>COO), 2.21 (2H, d, -ArCH<sub>2</sub>CH<sub>2</sub>CH<sub>2</sub>COO). <sup>13</sup>C NMR (101 MHz, CDCl<sub>3</sub>)  $\delta$  173.06, 135.44, 131.42, 130.89, 130.04, 128.76, 127.48, 127.45, 127.35, 126.79, 125.89, 125.11, 124.99, 124.82, 123.22, 56.28, 33.58, 32.68, 30.50, 26.53. M.P.: 89-90 °C. ESI-MS (m/z): [M+Na]<sup>+</sup> calcd. for C<sub>30</sub>H<sub>19</sub>F<sub>17</sub>NaO<sub>2</sub> 757.101, found 757.103 (Relative Abundance: 100).

## 1P1A

Decan-1-ol (0.88 g, 5.56 mmol), 1-pyrenebutyric acid (0.8 g, 2.78 mmol), EDC•HCl (1.06 g, 5.56 mmol), and dry THF (60 ml) were added to a round bottom flask equipped with a magnetic stir bar. After cooling to 0 °C in an ice-water bath, DMAP (1.35 g, 11.12 mmol) was added. The reaction was conducted under 25 °C for 12 h, and THF was removed in vacuo, the resulting liquid was dissolved in ethyl acetate, washed with aqueous 1 M HCl and brine, dried over MgSO<sub>4</sub>, and filtered. The crude product was purified by silica gel column chromatography to obtain the pure product as viscous liquid (0.98 g, 82 %). <sup>1</sup>H NMR (400 MHz, CDCl<sub>3</sub>), δ (TMS, ppm): 8.32-7.82 (9H, pyrene, -ArH), 4.07 (2H, d, -OCH<sub>2</sub>CH<sub>2</sub>), 3.35 (2H, a, -ArCH<sub>2</sub>CH<sub>2</sub>CH<sub>2</sub>COO), 2.44 (2H, c, -ArCH<sub>2</sub>CH<sub>2</sub>CH<sub>2</sub>COO), 2.18 (2H, b, -ArCH<sub>2</sub>CH<sub>2</sub>CH<sub>2</sub>COO), 1.62 (2H, e, -OCH<sub>2</sub>CH<sub>2</sub>), 1.40-1.15 (14H, f, -OCH<sub>2</sub>CH<sub>2</sub>CH<sub>2</sub>CH<sub>2</sub>CH<sub>2</sub>CH<sub>2</sub>CH<sub>2</sub>CH<sub>2</sub>CH<sub>2</sub>CH<sub>2</sub>CH<sub>3</sub>), 0.86 (3H, g, -CH<sub>2</sub>CH<sub>2</sub>CH<sub>3</sub>). <sup>13</sup>C NMR (101 MHz, CDCl<sub>3</sub>) δ 173.64, 135.80, 131.44, 130.93, 129.99, 128.78, 127.51, 127.40, 127.38, 126.73, 125.86, 125.12, 125.02, 124.93, 124.83, 124.79, 123.37, 64.69, 33.99, 32.84, 31.94, 29.58, 29.36, 29.32, 28.71, 26.88, 26.00, 22.73, 14.18. ESI-MS (m/z): [M+Na]<sup>+</sup> calcd. for C<sub>30</sub>H<sub>36</sub>NaO<sub>2</sub> 451.261, found 451.262 (Relative Abundance: 100).

## 3,3,4,4,5,5,6,6,7,7,8,8,9,9,10,10,10-heptafluorodecyl (4-nitrophenyl) carbonate

To a THF solution of 1,1,2,2-tetrahydroperfluoro-1-decanol (5.0 g, 10.77 mmol) was successively added dry pyridine (1 ml) and 4-nitrophenyl carbonochloridate (2.6 g, 12.92 mmol). The mixture was stirred for 12 h at room temperature. The solid was filtered off and the solvent THF was removed in vacuo, the resulting solid was dissolved in ethyl acetate, washed with aqueous NaHCO<sub>3</sub> (1.0 M). The organic phase was separated, dried with MgSO<sub>4</sub>, and filtered off. The crude product was purified by silica gel column chromatography, yielding a white solid (6.0 g, 90 %). <sup>1</sup>H NMR (400 MHz, CDCl<sub>3</sub>), δ (TMS, ppm): 8.30 (2H, d, -ArH), 7.40 (2H, c, -ArH), 4.61 (2H, b, -OCH<sub>2</sub>CH<sub>2</sub>CF<sub>2</sub>), 2.63 (2H, a, -OCH<sub>2</sub>CH<sub>2</sub>CF<sub>2</sub>).

## decyl (4-nitrophenyl) carbonate

To a THF solution of decan-1-ol (5.0 g, 31.6 mmol) was successively added dry pyridine (2.94 ml) and 4-nitrophenyl carbonochloridate (7.62 g, 37.92 mmol). The mixture was stirred for 12 h at room temperature. The solid was filtered off and the solvent THF was removed in vacuo, the resulting liquid was dissolved in ethyl acetate, washed with aqueous NaHCO<sub>3</sub> (1.0 M). The organic phase was separated, dried with MgSO<sub>4</sub>, and filtered off. The crude product was purified by silica gel column chromatography, yielding a viscous liquid (9.18 g, 90 %). <sup>1</sup>H NMR (400 MHz, CDCl<sub>3</sub>), δ (TMS, ppm): 8.28 (2H, a, -ArH), 7.39 (2H, b, -ArH), 4.29 (2H, c, -OCH<sub>2</sub>CH<sub>2</sub>), 1.76 (2H, d, -OCH<sub>2</sub>CH<sub>2</sub>CH<sub>2</sub>), 1.30 (14H, e, -OCH<sub>2</sub>CH<sub>2</sub>CH<sub>2</sub>CH<sub>2</sub>CH<sub>2</sub>CH<sub>2</sub>CH<sub>2</sub>CH<sub>2</sub>CH<sub>2</sub>CH<sub>2</sub>CH<sub>3</sub>), 0.88 (3H, f, -CH<sub>2</sub>CH<sub>2</sub>CH<sub>3</sub>).

### 1P2F

The THF (30 ml) solution of 3,3,4,4,5,5,6,6,7,7,8,8,9,9,10,10,10-heptafluorodecyl (4-nitrophenyl) carbonate (2.13 g, 3.38 mmol) was added 1,3-diaminopropan-2-ol (138 mg, 1.53 mmol) and Et<sub>3</sub>N (0.9 ml). The mixture was stirred for 18 h at room temperature, and THF was removed in vacuo, the resulting mixture was dissolved in ethyl acetate, and washed with aqueous Na<sub>2</sub>CO<sub>3</sub> (1.0 M) until the aqueous phase became colorless. The organic phase was separated, dried with MgSO<sub>4</sub>, and filtered off. Then, the filtrate was evaporated to obtain the crude solid product and used directly in the next step. The crude solid product and 1-pyrenebutyric acid (662 mg, 2.3 mmol), EDC•HCl (883 mg, 4.6 mmol), and dry THF (30 ml) were added to a round bottom flask equipped with a magnetic stir bar. After cooling to 0 °C in an ice-water bath, DMAP (1.16 g, 9.5 mmol) was added. The reaction was conducted under 25 °C for 12 h, and THF was removed in vacuo, the resulting solid was dissolved in ethyl acetate, washed with aqueous 1 M HCl and brine, dried over MgSO<sub>4</sub>, and filtered. The crude product was purified by silica gel column chromatography, yielding a white powder (1.48 g, 72 %). <sup>1</sup>H NMR (400 MHz, CDCl<sub>3</sub>), δ (TMS, ppm): 8.32-7.82 (9H, pyrene, -ArH), 5.20 (2H, h, -CH<sub>2</sub>NHCOO), 4.88 (1H, g, -NHCH<sub>2</sub>CHCH<sub>2</sub>NH), 4.31 (4H, b, -OCH<sub>2</sub>CH<sub>2</sub>CF<sub>2</sub>), 3.45-3.20 (6H, f+c, -NHCH<sub>2</sub>CHCH<sub>2</sub>NH and -ArCH<sub>2</sub>CH<sub>2</sub>CH<sub>2</sub>COO), 2.55-2.30 (6H, a+e, -OCH<sub>2</sub>CH<sub>2</sub>CF<sub>2</sub> and -ArCH<sub>2</sub>CH<sub>2</sub>CH<sub>2</sub>COO), 2.20 (2H, d, -ArCH<sub>2</sub>CH<sub>2</sub>CH<sub>2</sub>COO). <sup>13</sup>C NMR (101 MHz, CDCl<sub>3</sub>) δ 172.75, 156.24, 135.40, 131.41, 130.85, 130.05, 128.75, 127.49, 127.44, 127.38, 126.82, 125.92, 125.09, 125.03, 124.95, 124.84, 124.80, 123.19,

71.20, 57.10, 40.74, 33.62, 32.56, 30.73, 26.47. M.P.: 89-90 °C. ESI-MS (m/z): [M+Na]<sup>+</sup> calcd. for C<sub>45</sub>H<sub>30</sub>F<sub>34</sub>N<sub>2</sub>NaO<sub>6</sub> 1363.146, found 1363.150 (Relative Abundance: 100).

### 1P2A

Compound **1P2A** was synthesized according to the same general procedure described for the synthesis **1P2F**. Finally, the obtained pure product **1P2A** was viscous liquid. <sup>1</sup>H NMR (400 MHz, CDCl<sub>3</sub>), δ (TMS, ppm): 8.32-7.82 (9H, pyrene, -ArH), 5.16 (2H, f, -CH<sub>2</sub>NHCOO), 4.90 (1H, e, -NHCH<sub>2</sub>CHCH<sub>2</sub>NH), 3.99 (4H, g, -CH<sub>2</sub>CH<sub>2</sub>O), 3.45-3.20 (6H, d+a, -NHCH<sub>2</sub>CHCH<sub>2</sub>NH and -ArCH<sub>2</sub>CH<sub>2</sub>CH<sub>2</sub>COO), 2.43 (2H, c, -ArCH<sub>2</sub>CH<sub>2</sub>CH<sub>2</sub>COO), 2.18 (2H, b, -ArCH<sub>2</sub>CH<sub>2</sub>CH<sub>2</sub>COO), 1.53 (4H, h, -OCH<sub>2</sub>CH<sub>2</sub>CH<sub>2</sub>), 1.32-1.15 (28H, i, -OCH<sub>2</sub>CH<sub>2</sub>CH<sub>2</sub>CH<sub>2</sub>CH<sub>2</sub>CH<sub>2</sub>CH<sub>2</sub>CH<sub>2</sub>CH<sub>2</sub>CH<sub>2</sub>CH<sub>3</sub>), 0.87 (3H, j, -CH<sub>2</sub>CH<sub>2</sub>CH<sub>3</sub>). <sup>13</sup>C NMR (101 MHz, CDCl<sub>3</sub>) δ 172.82, 157.24, 135.56, 131.42, 130.89, 130.02, 128.76, 127.48, 127.39, 126.78, 125.88, 125.10, 124.98, 124.83, 123.26, 122.26, 71.62, 65.42, 40.66, 33.75, 32.64, 31.92, 29.57, 29.34, 29.31, 29.00, 26.59, 26.39, 25.83, 22.72, 14.17. ESI-MS (m/z): [M+Na]<sup>+</sup> calcd. for C<sub>45</sub>H<sub>64</sub>N<sub>2</sub>NaO<sub>6</sub> 751.466, found 751.465 (Relative Abundance: 100).

### 2P1F

The THF (20 ml) solution of 3,3,4,4,5,5,6,6,7,7,8,8,9,9,10,10,10-heptadecafluorodecyl (4-nitrophenyl) carbonate (1.0 g, 1.59 mmol) was added diethanolamine (334 mg, 3.18 mmol) and Et<sub>3</sub>N (0.44 ml). The mixture was stirred for 18 h at room temperature, and THF was removed in vacuo, the resulting mixture was dissolved in ethyl acetate, and washed with aqueous Na<sub>2</sub>CO<sub>3</sub> (1.0 M) until the aqueous phase became colorless. The organic phase was separated, dried with MgSO<sub>4</sub>, and filtered off. Then, the filtrate was evaporated to obtain the crude product and used directly in the next step. The crude product (0.6 g) and 1-pyrenebutyric acid (0.8 g, 2.8 mmol), EDC•HCl (0.74 g, 3.85 mmol), and dry THF (20 ml) were added to a round bottom flask equipped with a magnetic stir bar. After cooling to 0 °C in an ice-water bath, DMAP (1.02 g, 8.4 mmol) was added. The reaction was conducted under 25 °C for 12 h, and THF was removed in vacuo, the resulting mixture was dissolved in ethyl acetate, washed with aqueous 1 M HCl and brine, dried over MgSO<sub>4</sub>, and filtered. The crude product was purified by silica gel column chromatography to

obtain the pure product as viscous solid (0.77 g, 68 %).  $^1\text{H}$  NMR (400 MHz,  $\text{CDCl}_3$ ),  $\delta$  (TMS, ppm): 8.32-7.82 (9H, pyrene, -ArH), 4.30 (2H, a,  $-\text{OCH}_2\text{CH}_2\text{CF}_2$ ), 4.23-4.06 (4H, d,  $-\text{NCH}_2\text{CH}_2\text{O}$ ), 3.54-3.38 (4H, c,  $-\text{NCH}_2\text{CH}_2\text{O}$ ), 3.33 (4H, g,  $-\text{ArCH}_2\text{CH}_2\text{CH}_2\text{COO}$ ), 2.45-2.27 (6H, b+e,  $-\text{OCH}_2\text{CH}_2\text{CF}_2$  and  $-\text{ArCH}_2\text{CH}_2\text{CH}_2\text{COO}$ ), 2.15 (4H, f,  $-\text{ArCH}_2\text{CH}_2\text{CH}_2\text{COO}$ ).  $^{13}\text{C}$  NMR (101 MHz,  $\text{CDCl}_3$ )  $\delta$  173.24, 173.16, 155.36, 135.55, 135.43, 131.42, 130.88, 130.01, 128.73, 127.47, 127.43, 127.30, 126.77, 125.89, 125.09, 124.97, 124.81, 123.25, 123.20, 62.37, 62.06, 57.59, 47.56, 46.83, 33.70, 33.61, 32.69, 30.68, 29.80, 26.63, 26.60. ESI-MS (m/z):  $[\text{M}+\text{Na}]^+$  calcd. for  $\text{C}_{55}\text{H}_{42}\text{F}_{17}\text{NNaO}_6$  1158.264, found 1158.261 (Relative Abundance: 100).

## 2P1A

Compound **2P1A** was synthesized according to the same general procedure described for the synthesis **2P1F**. Finally, the obtained pure product **2P1A** was viscous liquid.  $^1\text{H}$  NMR (400 MHz,  $\text{CDCl}_3$ ),  $\delta$  (TMS, ppm): 8.32-7.82 (9H, pyrene, -ArH), 4.25-4.25 (4H, f,  $-\text{NCH}_2\text{CH}_2\text{O}$ ), 3.98 (2H, a,  $-\text{OCH}_2\text{CH}_2\text{CH}_2$ ), 3.55-3.40 (4H, e,  $-\text{NCH}_2\text{CH}_2\text{O}$ ), 3.30 (4H, i,  $-\text{ArCH}_2\text{CH}_2\text{CH}_2\text{COO}$ ), 2.40 (4H, g,  $-\text{ArCH}_2\text{CH}_2\text{CH}_2\text{COO}$ ), 2.13 (4H, h,  $-\text{ArCH}_2\text{CH}_2\text{CH}_2\text{COO}$ ), 1.50 (2H, b,  $-\text{OCH}_2\text{CH}_2\text{CH}_2$ ), 1.35-1.05 (14H, c,  $-\text{OCH}_2\text{CH}_2\text{CH}_2\text{CH}_2\text{CH}_2\text{CH}_2\text{CH}_2\text{CH}_2\text{CH}_2\text{CH}_2\text{CH}_2\text{CH}_3$ ), 0.85 (3H, d,  $-\text{CH}_2\text{CH}_2\text{CH}_3$ ).  $^{13}\text{C}$  NMR (101 MHz,  $\text{CDCl}_3$ )  $\delta$  173.27, 173.22, 156.26, 135.60, 135.47, 131.41, 130.88, 130.00, 128.73, 127.49, 127.43, 127.31, 126.76, 125.88, 125.09, 124.97, 124.82, 123.27, 65.98, 62.56, 62.33, 47.35, 46.80, 33.77, 33.69, 32.72, 31.94, 29.58, 29.55, 29.35, 29.29, 28.94, 26.66, 25.91, 22.74, 14.20. ESI-MS (m/z):  $[\text{M}+\text{Na}]^+$  calcd. for  $\text{C}_{55}\text{H}_{59}\text{NNaO}_6$  852.424, found 852.424 (Relative Abundance: 100).

## Supporting Figures

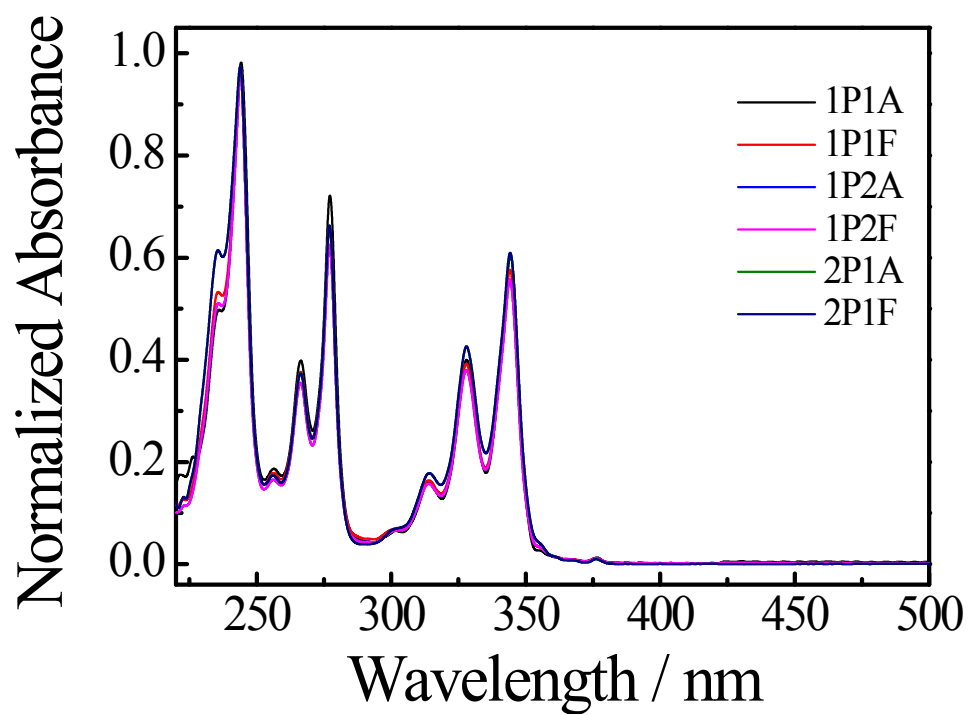

Fig. S1 Normalized absorption spectra of **1P1A**, **1P1F**, **1P2A**, **1P2F**, **2P1A** and **2P1F** in  $\text{CH}_2\text{Cl}_2$ .

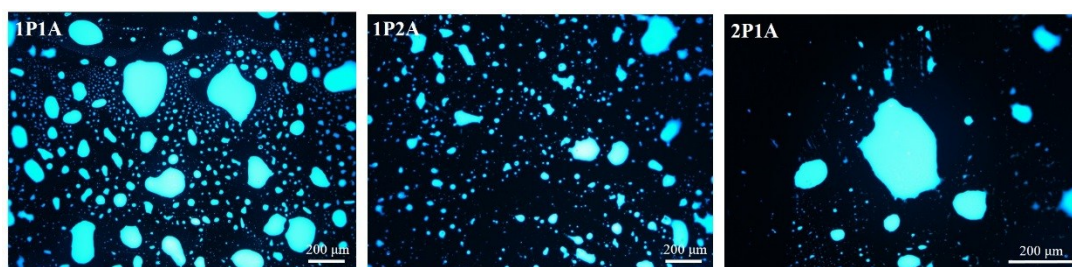

Fig. S2 Fluorescence microscopy images showing liquid-state morphologies of non-fluorinated pyrene derivatives **1P1A**, **1P2A** and **2P1A**.

# $^1\text{H}$ NMR, $^{13}\text{C}$ NMR and ESI-MS Spectra

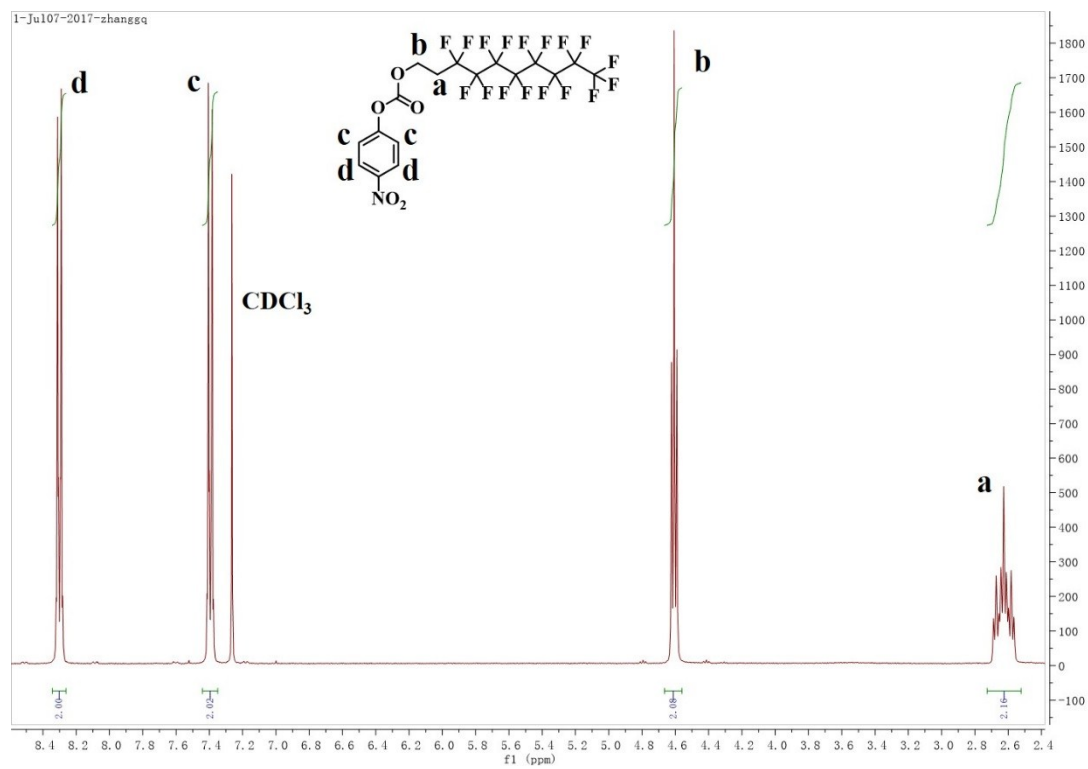

$^1\text{H}$  NMR spectrum of **3,3,4,4,5,5,6,6,7,7,8,8,9,9,10,10,10-heptafluorodecyl (4-nitrophenyl) carbonate** in CDCl<sub>3</sub>.





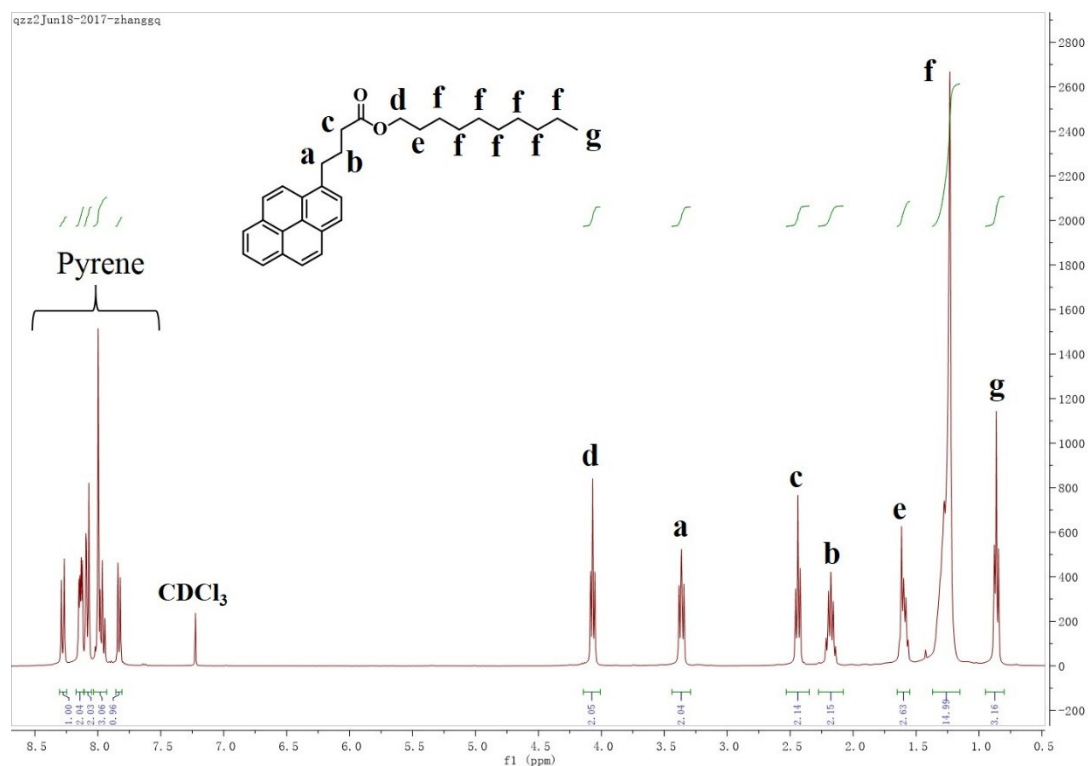

$^1\text{H}$  NMR spectrum of **1P1A** in  $\text{CDCl}_3$ .

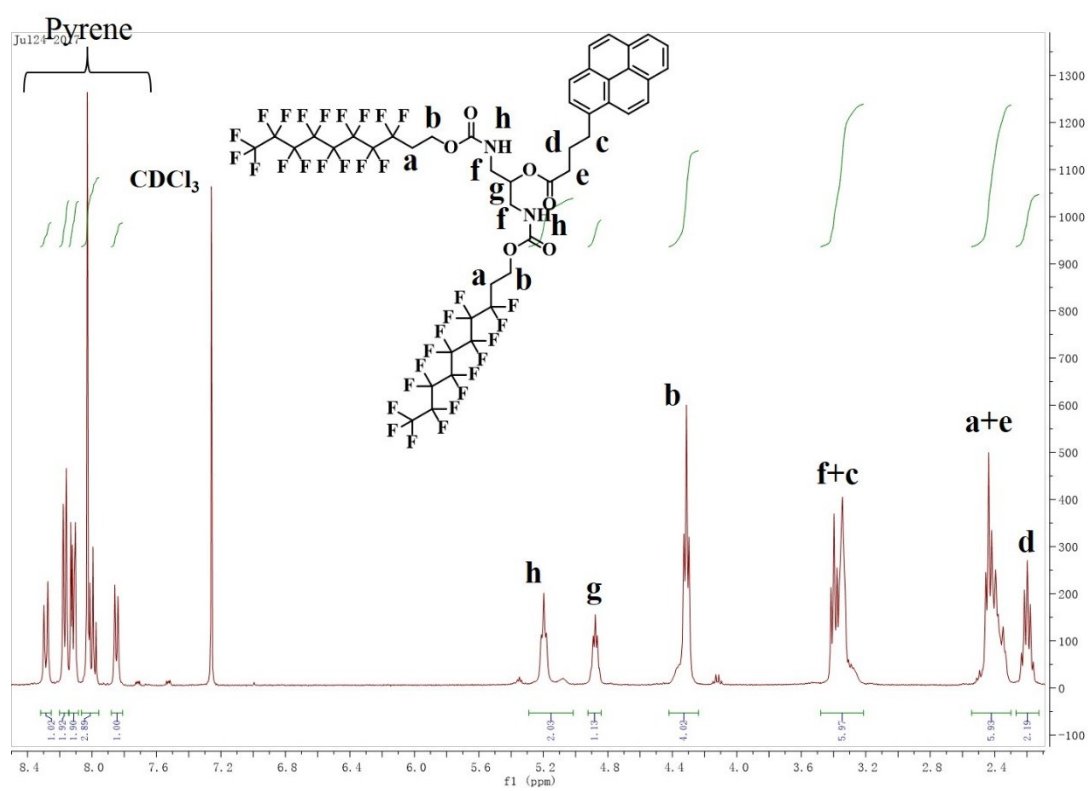

$^1\text{H}$  NMR spectrum of **1P2F** in  $\text{CDCl}_3$ .



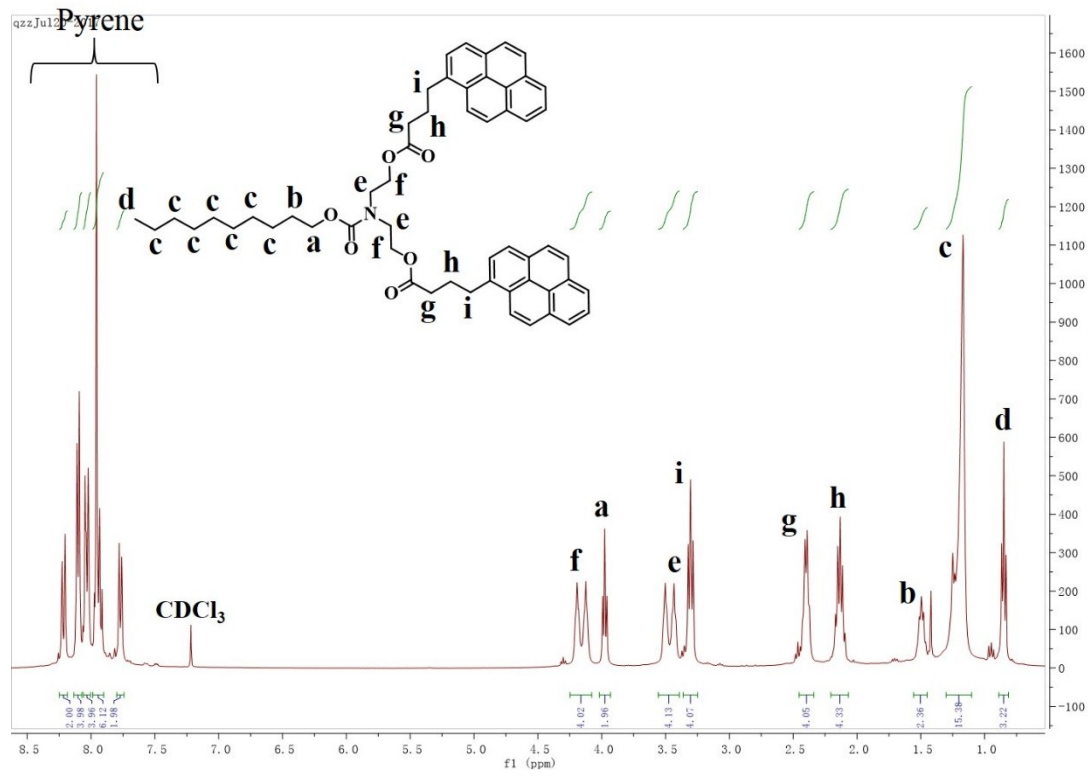

<sup>1</sup>H NMR spectrum of **2P1A** in CDCl<sub>3</sub>.

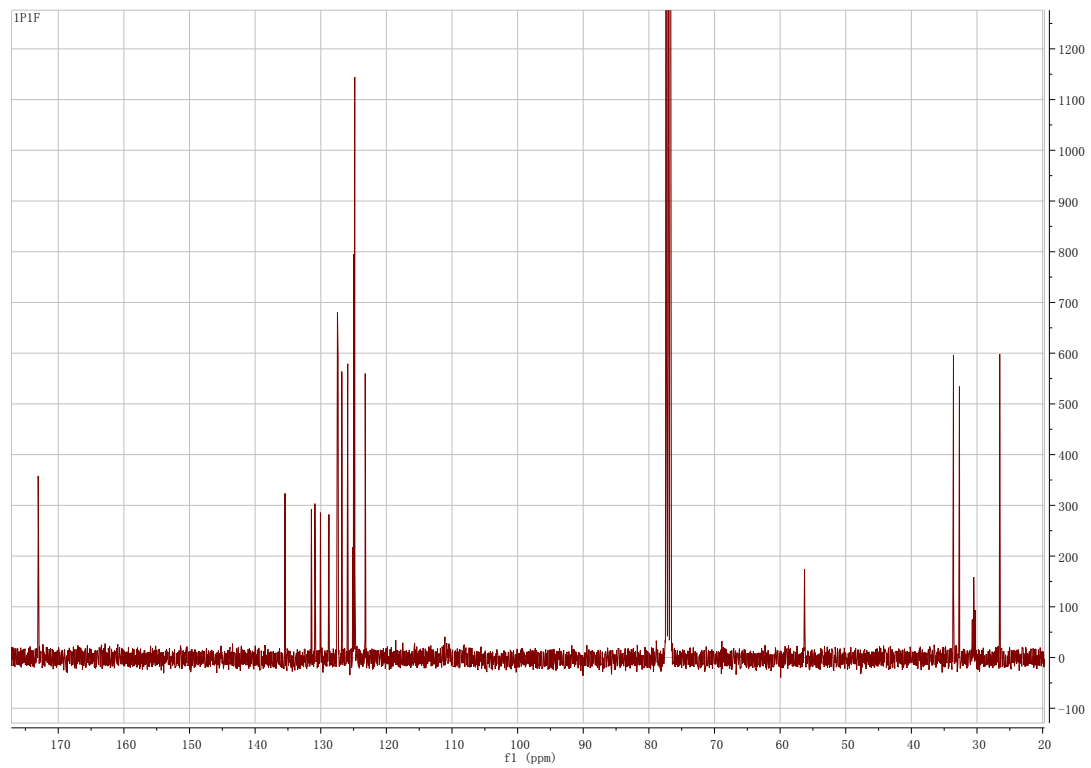

<sup>13</sup>C NMR spectrum of **1P1F** in CDCl<sub>3</sub>.

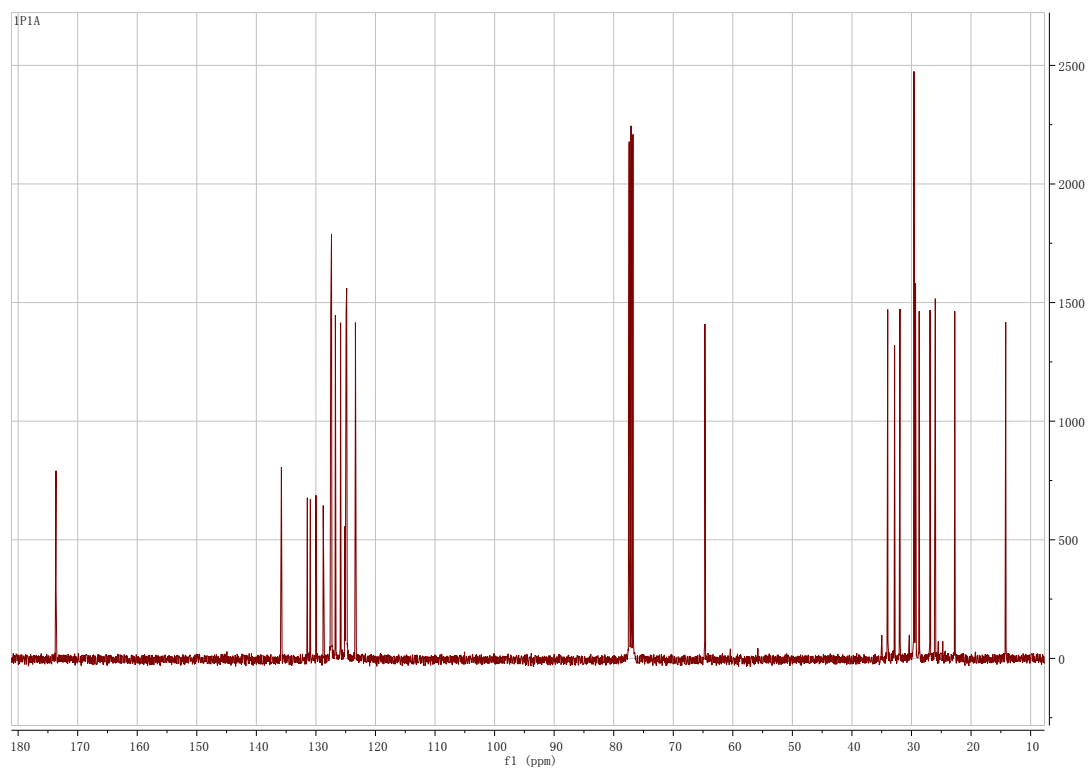

$^{13}\text{C}$  NMR spectrum of **1P1A** in  $\text{CDCl}_3$ .

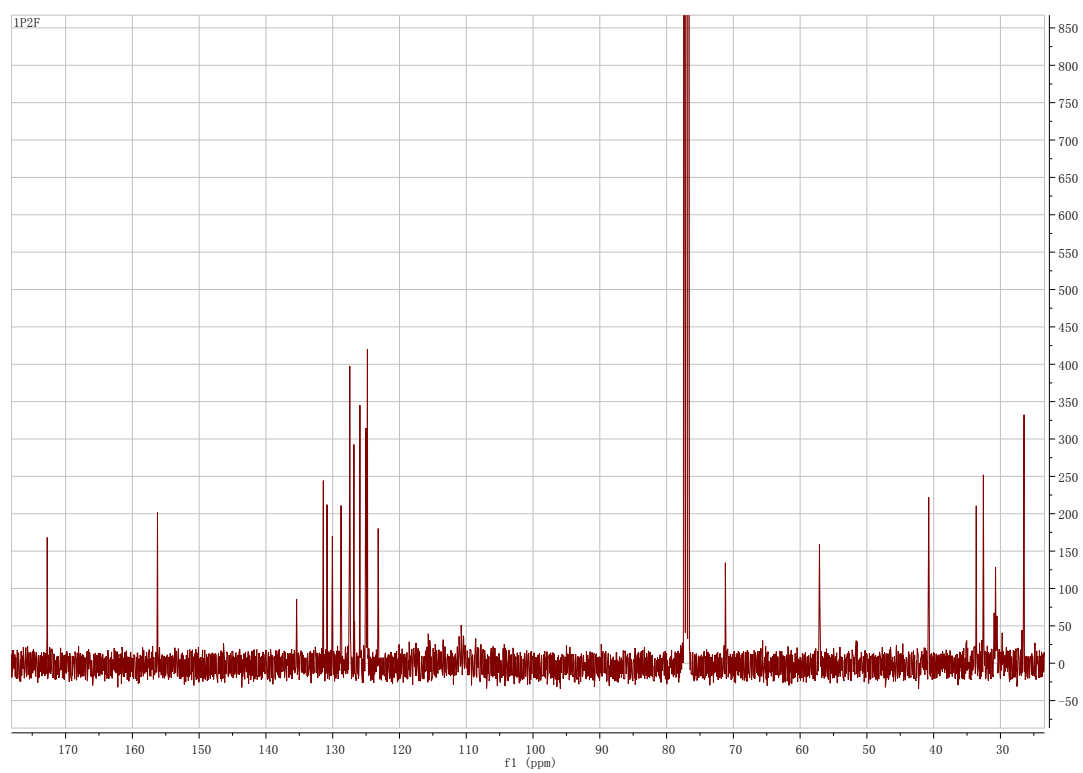

$^{13}\text{C}$  NMR spectrum of **1P2F** in  $\text{CDCl}_3$ .

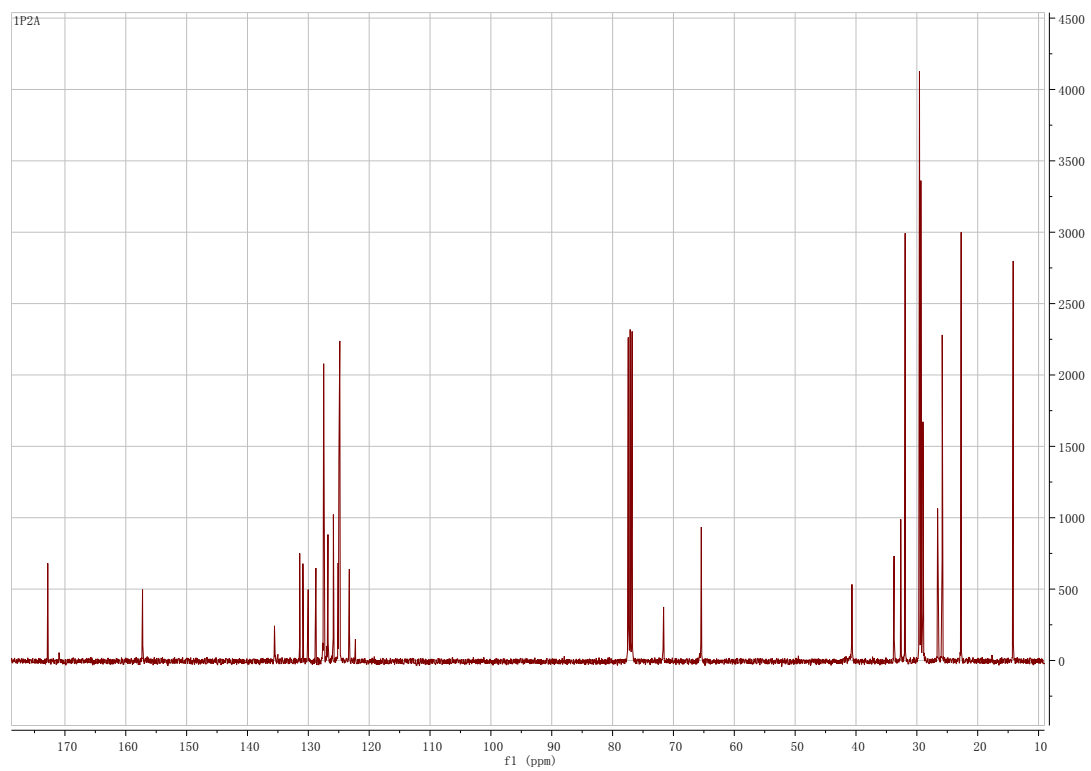

$^{13}\text{C}$  NMR spectrum of **1P2A** in  $\text{CDCl}_3$ .

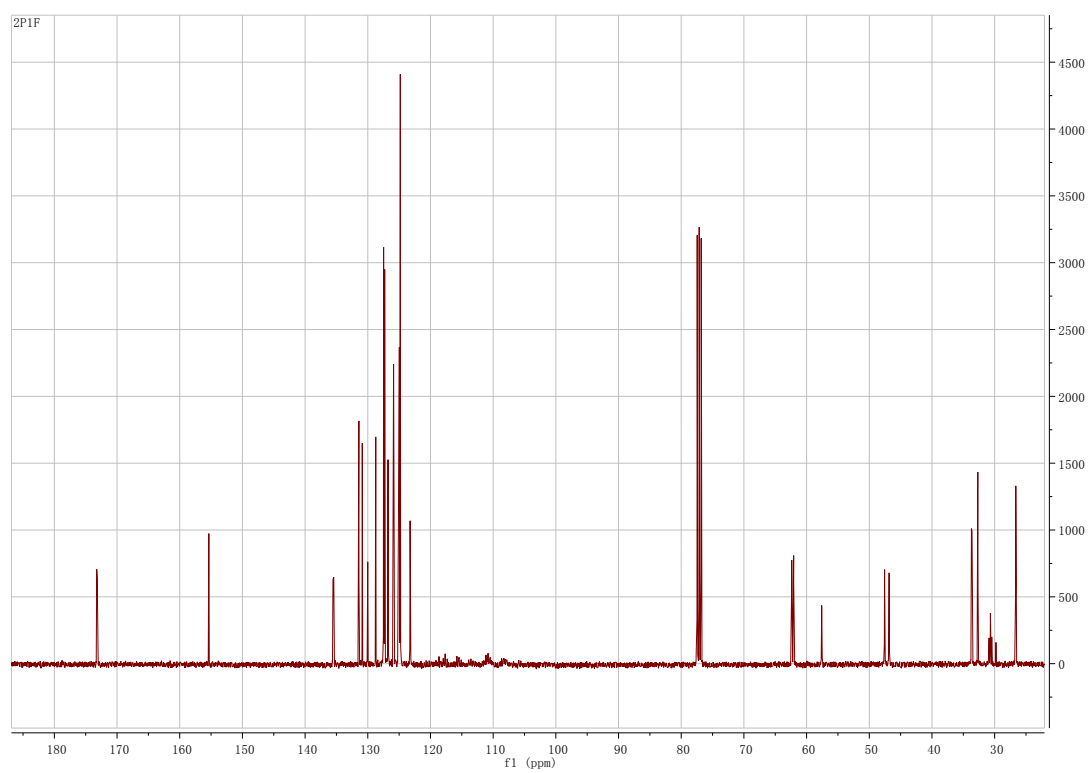

$^{13}\text{C}$  NMR spectrum of **2P1F** in  $\text{CDCl}_3$ .

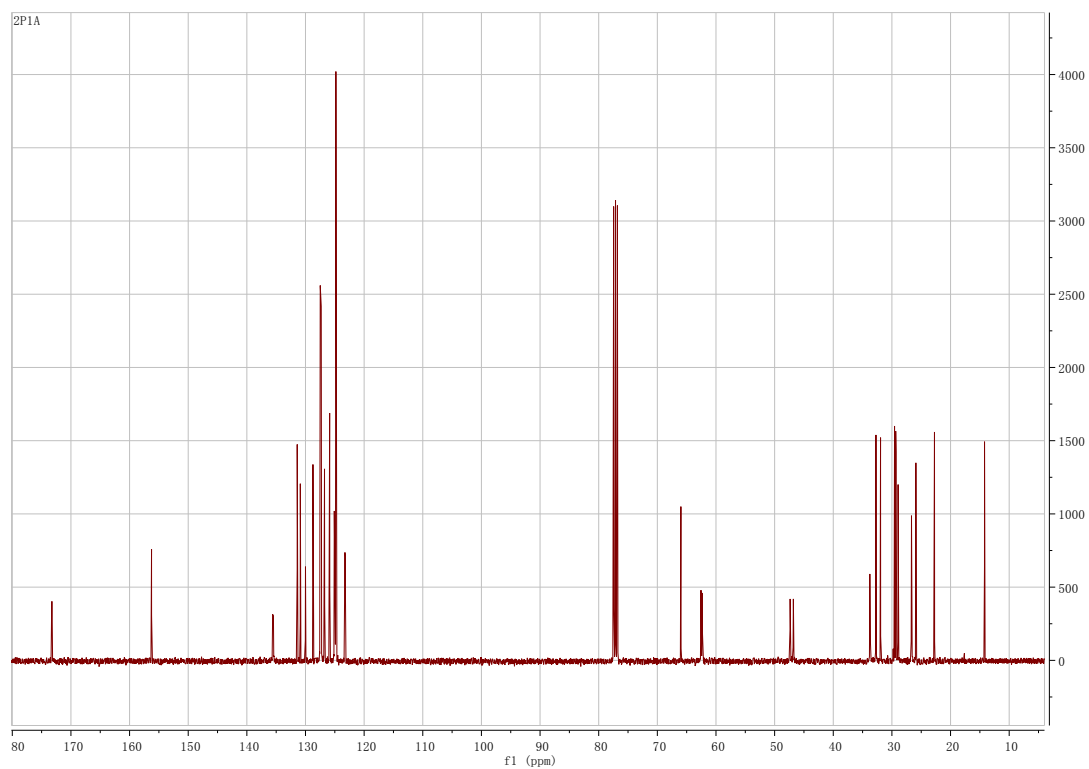

$^{13}\text{C}$  NMR spectrum of **2P1A** in  $\text{CDCl}_3$ .

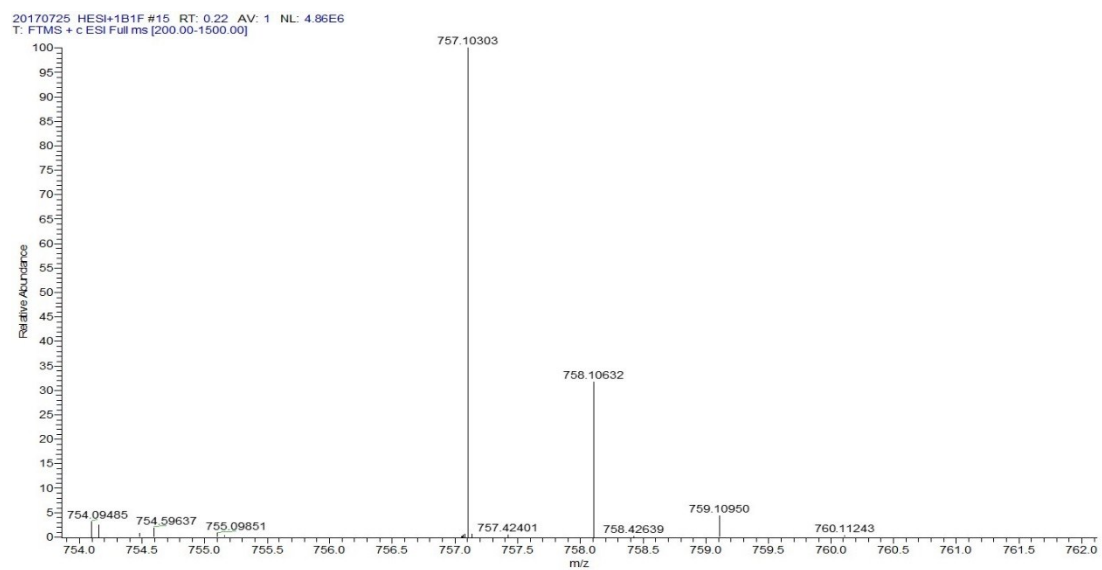

ESI-MS spectrum of **1P1F**.

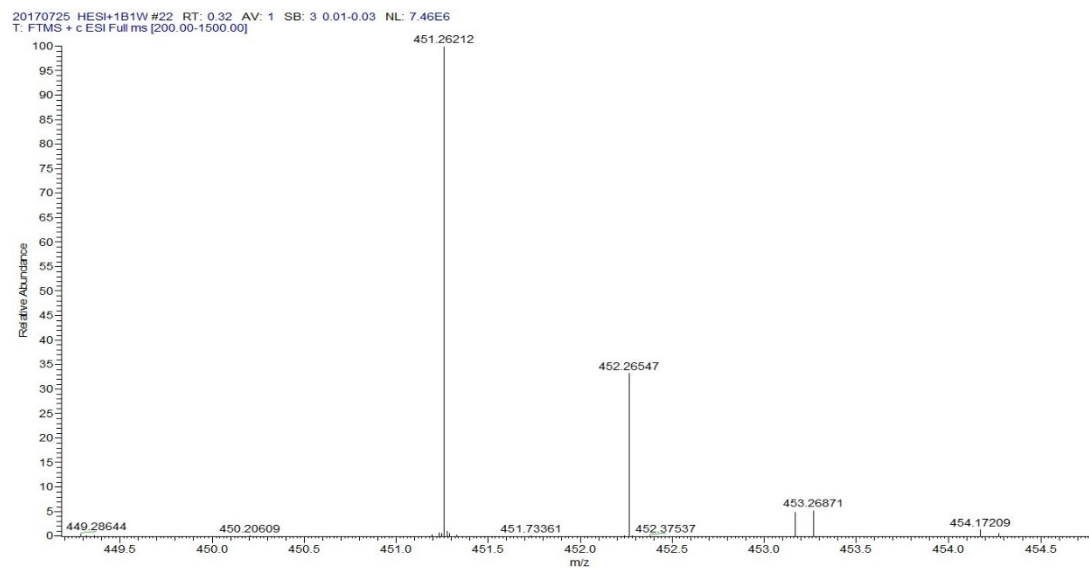

ESI-MS spectrum of **1P1A**.

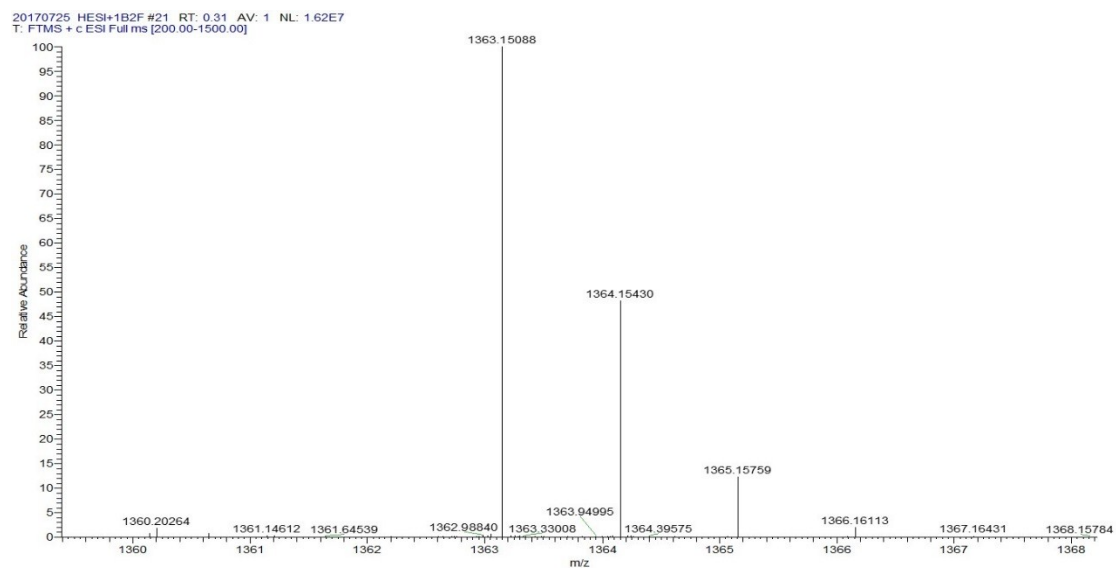

ESI-MS spectrum of **1P2F**.



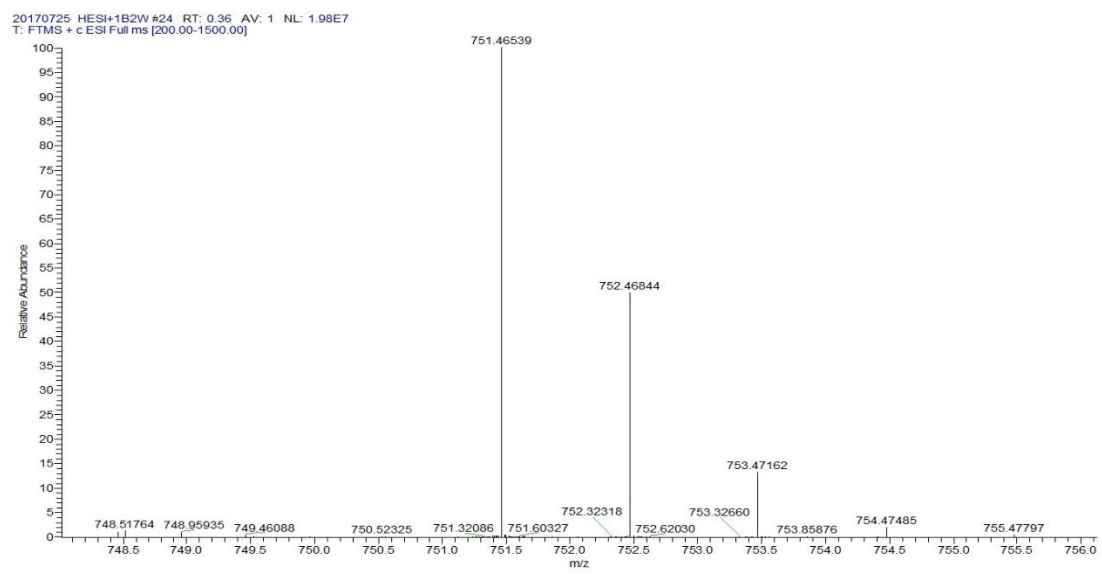

ESI-MS spectrum of **1P2A**.

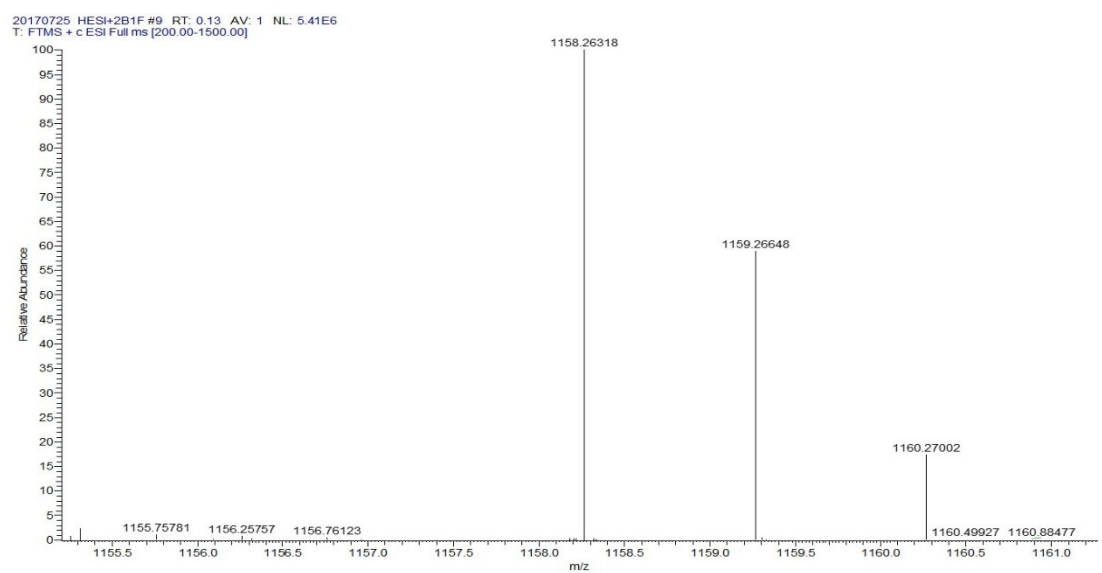

ESI-MS spectrum of **2P1F**.

20170725 HESI+2B1W #192 RT: 2.99 AV: 1 NL: 4.13E5  
T: FTMS + c ESI Full ms [200.00-1500.00]

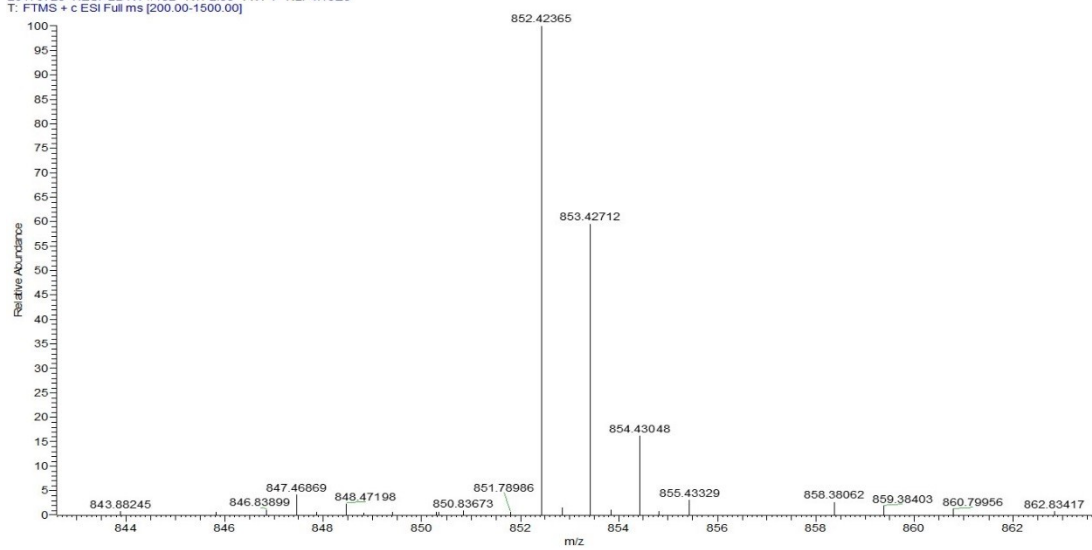

ESI-MS spectrum of **2P1A**.
